# Supplementary material
Source: PubMed Central journal article supplement (PMC2749034)

Supplemental Fig. 1. Histology. Hematoxylin and Eosin stainings of paraffin sections of WT and *syncoilin*<sup>-/-</sup> hearts at 3 months and 1 year of age.

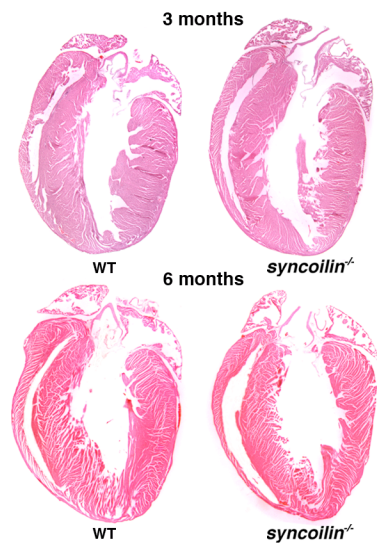

Supplement: NIHMS137237-supplement-Supplemental_Fig__1.pdf [file NIHMS137237-supplement-Supplemental_Fig__1.pdf]
